# Supplementary material for: Insight on noncovalent interactions and orbital constructs in low-dimensional antimony halide perovskites
Source: Royal Society of Chemistry journal article supplement (doi:10.1039/d2cp01996e), 2022-01-01

Electronic Supplementary Information (ESI)  
for

**Insight on noncovalent interactions and orbital constructs in low-dimensional antimony halide perovskites**

Aaron D. Nicholas,<sup>a</sup> Leah C. Garman,<sup>a</sup> Nicolina Albano,<sup>a</sup> Christopher L. Cahill<sup>a</sup>

<sup>a</sup>Department of Chemistry, The George Washington University, 800 22<sup>nd</sup> Street, NW, Washington, DC, 20052, USA.

**Electronic Supplementary Information Section**

|                    |                                                                                                                                              |    |
|--------------------|----------------------------------------------------------------------------------------------------------------------------------------------|----|
| <b>Figure S1.</b>  | ORTEP drawing of compound <b>1</b> , (C <sub>5</sub> H <sub>6</sub> N)[SbCl <sub>4</sub> ] .....                                             | 02 |
| <b>Table S1.</b>   | Bond distances and angles for compound <b>1</b> , (C <sub>5</sub> H <sub>6</sub> N)[SbCl <sub>4</sub> ].....                                 | 03 |
| <b>Figure S2.</b>  | ORTEP drawing of compound <b>2</b> , (C <sub>5</sub> H <sub>5</sub> NBr) <sub>3</sub> [Sb <sub>2</sub> Cl <sub>9</sub> ].....                | 04 |
| <b>Table S2.</b>   | Bond distances and angles for compound <b>2</b> , (C <sub>5</sub> H <sub>5</sub> NBr) <sub>3</sub> [Sb <sub>2</sub> Cl <sub>9</sub> ] .....  | 05 |
| <b>Figure S3.</b>  | ORTEP drawing of compound <b>3</b> , (C <sub>5</sub> H <sub>5</sub> NBr) <sub>6</sub> [Sb <sub>4</sub> Cl <sub>18</sub> ].....               | 06 |
| <b>Table S3.</b>   | Bond distances and angles for compound <b>3</b> , (C <sub>5</sub> H <sub>5</sub> NBr) <sub>6</sub> [Sb <sub>4</sub> Cl <sub>18</sub> ] ..... | 07 |
| <b>Figure S4.</b>  | ORTEP drawing of compound <b>4</b> , (C <sub>5</sub> H <sub>6</sub> N)[SbBr <sub>4</sub> ].....                                              | 08 |
| <b>Table S4.</b>   | Bond distances and angles for compound <b>4</b> , (C <sub>5</sub> H <sub>6</sub> N)[SbBr <sub>4</sub> ].....                                 | 09 |
| <b>Figure S5.</b>  | ORTEP drawing of compound <b>5</b> , (C <sub>5</sub> H <sub>5</sub> NCI)[SbBr <sub>4</sub> ].....                                            | 10 |
| <b>Table S5.</b>   | Bond distances and angles for compound <b>5</b> , (C <sub>5</sub> H <sub>5</sub> NCI)[SbBr <sub>4</sub> ] .....                              | 11 |
| <b>Figure S6.</b>  | ORTEP drawing of compound <b>6</b> , (C <sub>5</sub> H <sub>6</sub> N)[SbI <sub>4</sub> ].....                                               | 12 |
| <b>Table S6.</b>   | Bond distances and angles for compound <b>6</b> , (C <sub>5</sub> H <sub>6</sub> N)[SbI <sub>4</sub> ] .....                                 | 13 |
| <b>Figure S7.</b>  | ORTEP drawing of compound <b>7</b> , (C <sub>5</sub> H <sub>5</sub> NCI)[SbI <sub>4</sub> ] .....                                            | 14 |
| <b>Table S7.</b>   | Bond distances and angles for compound <b>7</b> , (C <sub>5</sub> H <sub>5</sub> NCI)[SbI <sub>4</sub> ].....                                | 15 |
| <b>Figure S8.</b>  | ORTEP drawing of compound <b>8</b> , (C <sub>5</sub> H <sub>5</sub> NBr)[SbI <sub>4</sub> ] .....                                            | 16 |
| <b>Table S8.</b>   | Bond distances and angles for compound <b>8</b> , (C <sub>5</sub> H <sub>5</sub> NBr)[SbI <sub>4</sub> ].....                                | 17 |
| <b>Figure S9.</b>  | ESP surfaces of para-halopyridinium cations used in the synthesis of <b>1-8</b> .....                                                        | 18 |
| <b>Figure S10.</b> | Tauc plot of compounds <b>1-8</b> .....                                                                                                      | 19 |
| <b>Figure S11.</b> | NBO calculation models of <b>1-8</b> .....                                                                                                   | 20 |
| <b>Table S9.</b>   | NLMO metrics for specific atoms of SbX bond .....                                                                                            | 21 |
| <b>Table S10.</b>  | Specific SOPT values for NCI stabilization energy (kcal/mol) .....                                                                           | 22 |
| <b>Table S11.</b>  | QTAIM metrics for the three crystallographically unique Sb-X bonds in <b>1-8</b> .....                                                       | 23 |
| <b>Figure S12.</b> | Correlation plots of <b>1-8</b> .....                                                                                                        | 24 |

**Figure S1.** ORTEP drawing of compound **1**,  $(C_5H_6N)[SbCl_4]$ .

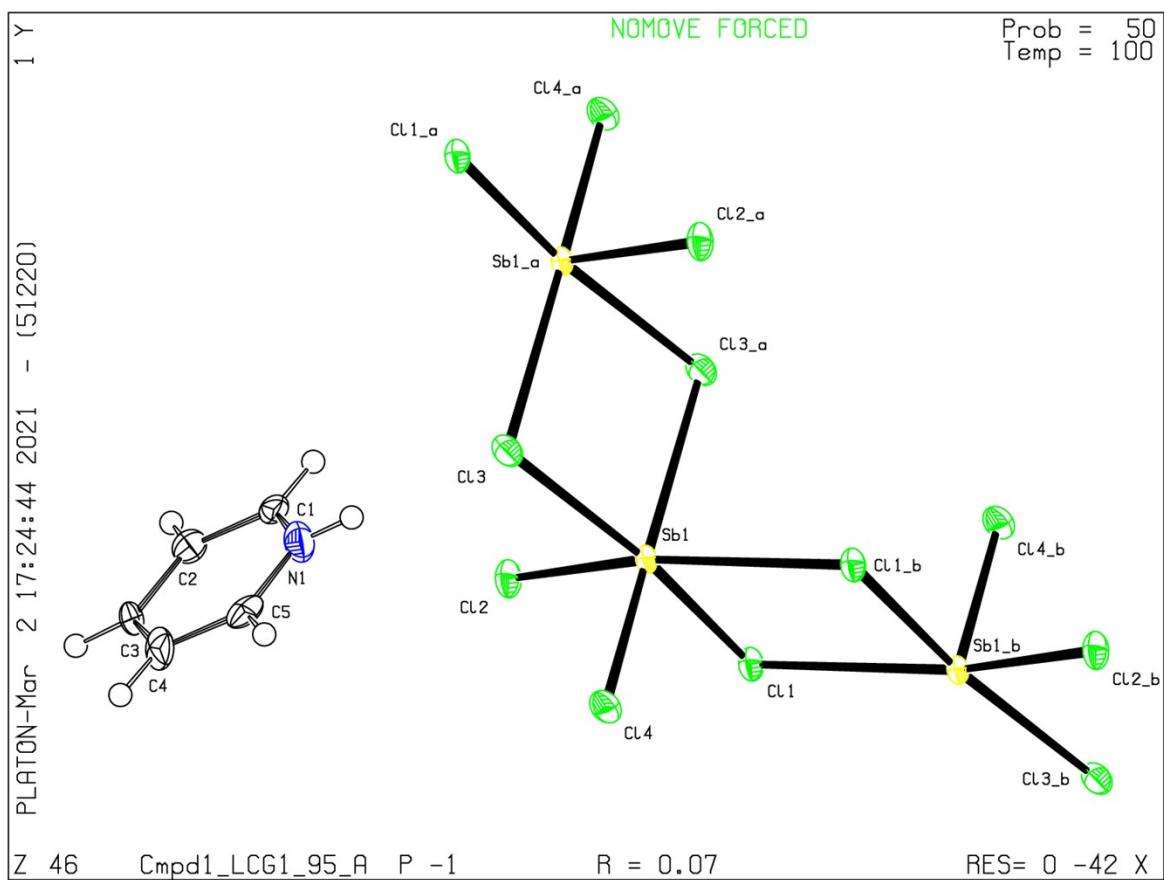

**Table S1.** Bond distances and angles for compound **1**, (C<sub>5</sub>H<sub>6</sub>N)[SbCl<sub>4</sub>].

| Atom1 | Atom2 | Length (Å) | Atom1 | Atom2 | Atom3 | Angle (°) |
|-------|-------|------------|-------|-------|-------|-----------|
| Sb1   | Cl1   | 2.528(3)   | N1    | C5    | C4    | 118(1)    |
| Sb1   | Cl2   | 2.393(4)   | N1    | C1    | C2    | 120(1)    |
| Sb1   | Cl3   | 2.849(4)   | Cl3   | Sb1   | Cl4   | 87.9(1)   |
| Sb1   | Cl4   | 2.420(4)   | Cl2   | Sb1   | Cl3   | 84.69(9)  |
| N1    | C1    | 1.34(2)    | Cl2   | Sb1   | Cl4   | 94.3(1)   |
| N1    | C5    | 1.35(2)    | Cl1   | Sb1   | Cl2   | 88.6(1)   |
| C4    | C5    | 1.38(2)    | Cl1   | Sb1   | Cl3   | 172.93(9) |
| C3    | C4    | 1.39(2)    | Cl1   | Sb1   | Cl4   | 90.5(1)   |
| C2    | C3    | 1.38(2)    | C3    | C4    | C5    | 122(1)    |
| C1    | C2    | 1.38(2)    | C2    | C3    | C4    | 118(1)    |
|       |       |            | C1    | N1    | C5    | 122(1)    |
|       |       |            | C1    | C2    | C3    | 120(1)    |

**Figure S2.** ORTEP drawing of compound **2**,  $(C_5H_5NCl)[Sb_2Cl_9]$ .

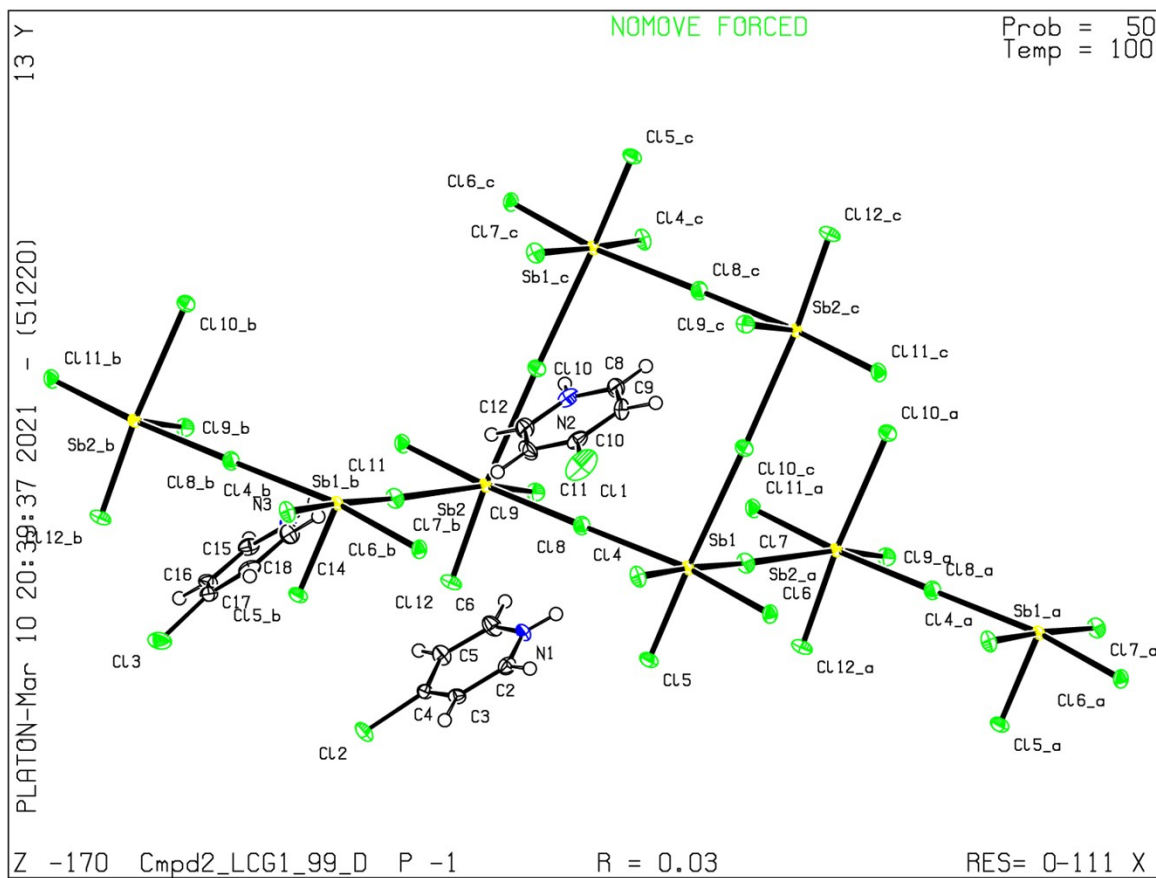

**Table S2.** Bond distances and angles for compound **2**, (C<sub>5</sub>H<sub>5</sub>NCI)[Sb<sub>2</sub>Cl<sub>9</sub>].

| Atom1 | Atom2 | Length (Å) | Atom1 | Atom2 | Atom3 | Angle (°) |
|-------|-------|------------|-------|-------|-------|-----------|
| Sb2   | Cl10  | 3.0044(7)  | Sb1   | Cl8   | Sb2   | 178.22(3) |
| Sb2   | Cl11  | 2.5067(8)  | N3    | C18   | C17   | 119.3(2)  |
| Sb2   | Cl12  | 2.4136(7)  | N3    | C14   | C15   | 120.2(3)  |
| Sb2   | Cl8   | 2.7725(8)  | N2    | C8    | C9    | 119.9(3)  |
| Sb2   | Cl9   | 2.3887(8)  | N2    | C12   | C11   | 120.4(3)  |
| Sb1   | Cl4   | 2.6412(8)  | N1    | C6    | C5    | 119.8(3)  |
| Sb1   | Cl5   | 2.4092(7)  | N1    | C2    | C3    | 119.6(2)  |
| Sb1   | Cl6   | 2.4312(8)  | Cl9   | Sb2   | Cl10  | 84.94(2)  |
| Sb1   | Cl7   | 2.6098(8)  | Cl9   | Sb2   | Cl11  | 88.42(3)  |
| Sb1   | Cl8   | 2.9879(8)  | Cl9   | Sb2   | Cl12  | 89.76(3)  |
| N3    | C14   | 1.331(5)   | Cl8   | Sb2   | Cl10  | 87.20(2)  |
| N3    | C18   | 1.341(3)   | Cl8   | Sb2   | Cl11  | 175.69(2) |
| N2    | C12   | 1.331(4)   | Cl8   | Sb2   | Cl12  | 90.60(2)  |
| N2    | C8    | 1.337(4)   | Cl8   | Sb2   | Cl9   | 89.02(2)  |
| N1    | C2    | 1.343(4)   | Cl7   | Sb1   | Cl8   | 92.03(2)  |
| N1    | C6    | 1.336(5)   | Cl6   | Sb1   | Cl7   | 88.45(2)  |
| Cl3   | C16   | 1.719(3)   | Cl6   | Sb1   | Cl8   | 173.18(2) |
| Cl2   | C4    | 1.716(3)   | Cl5   | Sb1   | Cl6   | 90.68(3)  |
| Cl1   | C10   | 1.719(4)   | Cl5   | Sb1   | Cl7   | 91.24(2)  |
| C9    | C10   | 1.374(4)   | Cl5   | Sb1   | Cl8   | 82.51(2)  |
| C8    | C9    | 1.363(5)   | Cl4   | Sb1   | Cl5   | 89.33(2)  |
| C5    | C6    | 1.373(4)   | Cl4   | Sb1   | Cl6   | 86.44(2)  |
| C4    | C5    | 1.383(4)   | Cl4   | Sb1   | Cl7   | 174.86(2) |
| C3    | C4    | 1.383(4)   | Cl4   | Sb1   | Cl8   | 93.11(2)  |
| C2    | C3    | 1.372(4)   | Cl3   | C16   | C15   | 119.9(2)  |
| C17   | C18   | 1.364(4)   | Cl3   | C16   | C17   | 119.3(2)  |
| C16   | C17   | 1.387(5)   | Cl2   | C4    | C3    | 119.0(2)  |
| C15   | C16   | 1.387(5)   | Cl2   | C4    | C5    | 120.3(2)  |
| C14   | C15   | 1.378(4)   | Cl11  | Sb2   | Cl12  | 92.84(3)  |
| C11   | C12   | 1.363(5)   | Cl10  | Sb2   | Cl11  | 89.13(2)  |
| C10   | C11   | 1.381(5)   | Cl10  | Sb2   | Cl12  | 174.29(2) |
|       |       |            | Cl1   | C10   | C11   | 118.8(2)  |
|       |       |            | Cl1   | C10   | C9    | 120.1(2)  |
|       |       |            | C9    | C10   | C11   | 121.1(3)  |
|       |       |            | C8    | N2    | C12   | 122.4(3)  |
|       |       |            | C8    | C9    | C10   | 118.4(3)  |
|       |       |            | C4    | C5    | C6    | 118.5(3)  |
|       |       |            | C3    | C4    | C5    | 120.7(3)  |
|       |       |            | C2    | N1    | C6    | 122.8(3)  |
|       |       |            | C2    | C3    | C4    | 118.5(2)  |
|       |       |            | C16   | C17   | C18   | 119.0(3)  |
|       |       |            | C15   | C16   | C17   | 120.8(3)  |
|       |       |            | C14   | N3    | C18   | 123.1(3)  |
|       |       |            | C14   | C15   | C16   | 117.6(3)  |
|       |       |            | C10   | C11   | C12   | 117.9(3)  |

**Figure S3.** ORTEP drawing of compound **3**,  $(C_5H_5NBr)[Sb_2Cl_9]$ .

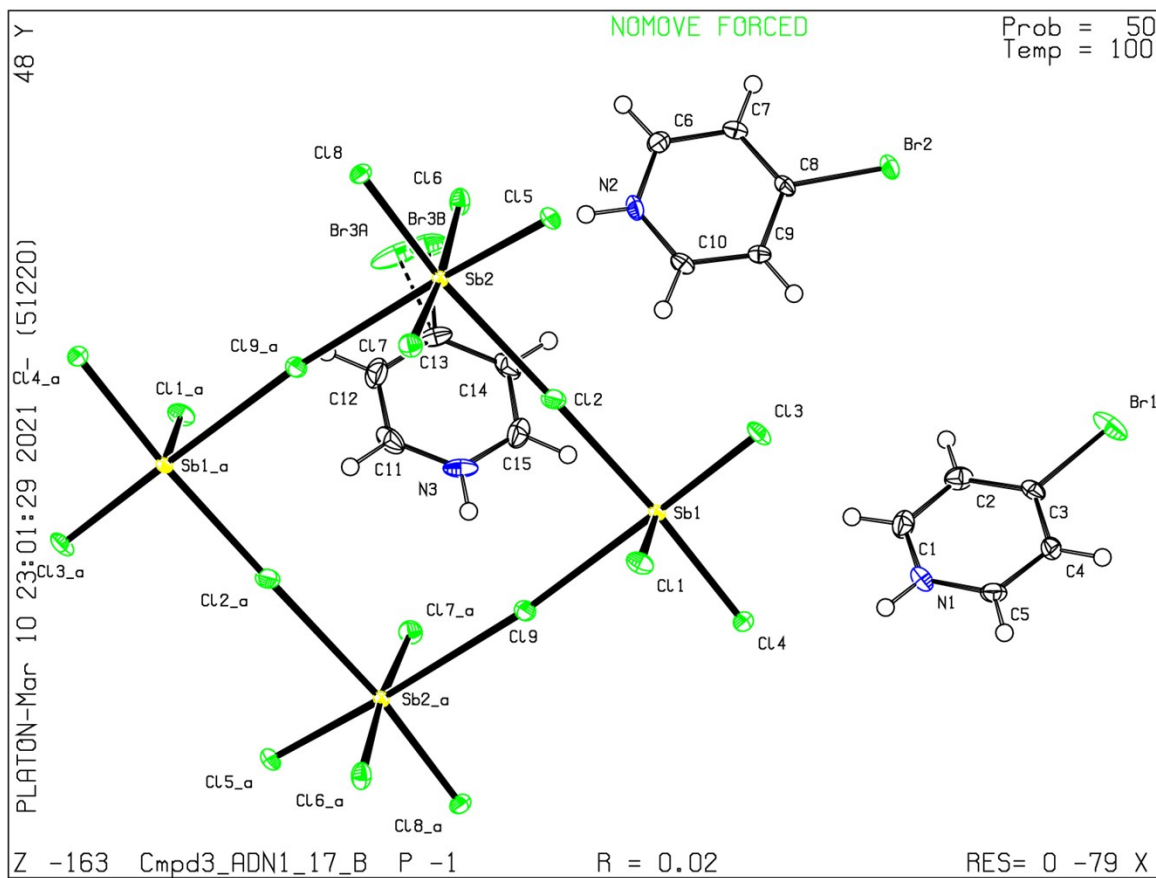

**Table S3.** Bond distances and angles for compound **3**, (C<sub>5</sub>H<sub>5</sub>NBr)[Sb<sub>2</sub>Cl<sub>9</sub>].

| Atom1 | Atom2 | Length (Å) | Atom1 | Atom2 | Atom3 | Angle (°) |
|-------|-------|------------|-------|-------|-------|-----------|
| Sb2   | Cl5   | 2.4082(6)  | Sb1   | Cl2   | Sb2   | 178.03(3) |
| Sb2   | Cl6   | 2.6400(8)  | N3    | C15   | C14   | 120.1(3)  |
| Sb2   | Cl7   | 2.6135(7)  | N3    | C11   | C12   | 119.7(3)  |
| Sb2   | Cl8   | 2.4259(7)  | N2    | C6    | C7    | 119.7(2)  |
| Sb1   | Cl1   | 2.3839(7)  | N2    | C10   | C9    | 120.1(2)  |
| Sb1   | Cl2   | 2.7745(8)  | N1    | C5    | C4    | 119.6(2)  |
| Sb1   | Cl3   | 2.4170(6)  | N1    | C1    | C2    | 120.1(2)  |
| Sb1   | Cl4   | 2.5052(7)  | Cl7   | Sb2   | Cl8   | 88.47(2)  |
| Sb1   | Cl9   | 2.9896(7)  | Cl6   | Sb2   | Cl7   | 174.54(2) |
| N3    | C11   | 1.331(4)   | Cl6   | Sb2   | Cl8   | 86.13(2)  |
| N3    | C15   | 1.330(4)   | Cl5   | Sb2   | Cl6   | 89.57(2)  |
| N2    | C10   | 1.340(4)   | Cl5   | Sb2   | Cl7   | 91.38(2)  |
| N2    | C6    | 1.339(4)   | Cl5   | Sb2   | Cl8   | 90.90(2)  |
| N1    | C1    | 1.333(4)   | Cl4   | Sb1   | Cl9   | 88.91(2)  |
| N1    | C5    | 1.341(3)   | Cl3   | Sb1   | Cl4   | 93.20(2)  |
| Cl2   | Sb2   | 3.0148(8)  | Cl3   | Sb1   | Cl9   | 174.51(2) |
| C9    | C10   | 1.377(4)   | Cl2   | Sb2   | Cl5   | 82.59(2)  |
| C8    | C9    | 1.384(4)   | Cl2   | Sb2   | Cl6   | 93.48(2)  |
| C7    | C8    | 1.378(4)   | Cl2   | Sb2   | Cl7   | 91.98(2)  |
| C6    | C7    | 1.378(4)   | Cl2   | Sb2   | Cl8   | 173.48(2) |
| C4    | C5    | 1.376(4)   | Cl2   | Sb1   | Cl3   | 90.02(2)  |
| C3    | C4    | 1.386(4)   | Cl2   | Sb1   | Cl4   | 175.92(2) |
| C2    | C3    | 1.389(3)   | Cl2   | Sb1   | Cl9   | 87.66(2)  |
| C14   | C15   | 1.365(5)   | Cl1   | Sb1   | Cl2   | 89.01(2)  |
| C13   | C14   | 1.373(4)   | Cl1   | Sb1   | Cl3   | 90.17(2)  |
| C12   | C13   | 1.374(4)   | Cl1   | Sb1   | Cl4   | 88.48(2)  |
| C11   | C12   | 1.367(5)   | Cl1   | Sb1   | Cl9   | 84.82(2)  |
| C1    | C2    | 1.377(4)   | C8    | C9    | C10   | 117.8(2)  |
| Br3A  | C13   | 1.88(1)    | C7    | C8    | C9    | 121.4(2)  |
| Br2   | C8    | 1.880(2)   | C6    | N2    | C10   | 122.6(2)  |
| Br1   | C3    | 1.873(3)   | C6    | C7    | C8    | 118.3(2)  |
|       |       |            | C3    | C4    | C5    | 118.7(2)  |
|       |       |            | C2    | C3    | C4    | 120.5(2)  |
|       |       |            | C13   | C14   | C15   | 118.3(3)  |
|       |       |            | C12   | C13   | C14   | 120.8(3)  |
|       |       |            | C11   | N3    | C15   | 122.5(3)  |
|       |       |            | C11   | C12   | C13   | 118.5(3)  |
|       |       |            | C1    | N1    | C5    | 122.9(2)  |
|       |       |            | C1    | C2    | C3    | 118.2(2)  |
|       |       |            | Br3A  | C13   | C12   | 109.0(3)  |
|       |       |            | Br3A  | C13   | C14   | 129.8(3)  |
|       |       |            | Br2   | C8    | C7    | 118.8(2)  |
|       |       |            | Br2   | C8    | C9    | 119.8(2)  |
|       |       |            | Br1   | C3    | C2    | 120.2(2)  |
|       |       |            | Br1   | C3    | C4    | 119.3(2)  |

**Figure S4.** ORTEP drawing of compound **4**,  $(C_5H_6N)[SbBr_4]$ .

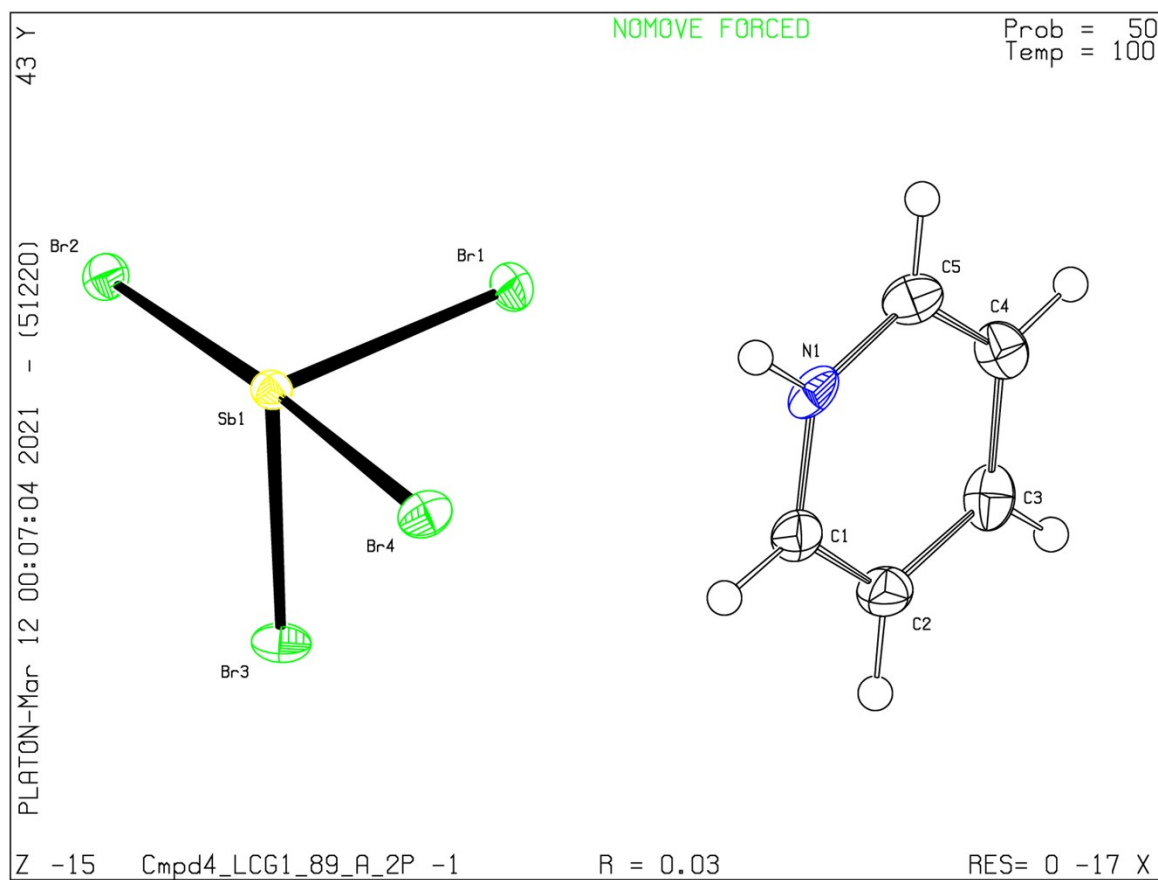



**Table S4.** Bond distances and angles for compound **4**, (C<sub>5</sub>H<sub>6</sub>N)[SbBr<sub>4</sub>].

| Atom1 | Atom2 | Length (Å) | Atom1 | Atom2 | Atom3 | Angle (°) |
|-------|-------|------------|-------|-------|-------|-----------|
| Sb1   | Br1   | 2.5778(7)  | Sb1   | Br2   | Sb1   | 91.31(1)  |
| Sb1   | Br1   | 2.5778(7)  | Sb1   | Br2   | Sb1   | 91.31(1)  |
| Sb1   | Br2   | 2.9502(8)  | C4    | C5    | N1    | 119.1(4)  |
| Sb1   | Br2   | 2.9502(8)  | C3    | C4    | C5    | 119.8(4)  |
| Sb1   | Br2   | 3.1036(8)  | C2    | C3    | C4    | 118.8(5)  |
| Sb1   | Br3   | 2.5569(7)  | C2    | C1    | N1    | 119.1(4)  |
| Sb1   | Br3   | 2.5569(7)  | C1    | N1    | C5    | 123.5(4)  |
| Sb1   | Br4   | 2.6995(8)  | C1    | C2    | C3    | 119.6(5)  |
| Sb1   | Br4   | 2.6995(8)  | Br4   | Sb1   | Br2   | 91.20(1)  |
| C5    | N1    | 1.331(6)   | Br3   | Sb1   | Br2   | 86.96(2)  |
| C4    | C5    | 1.377(7)   | Br3   | Sb1   | Br4   | 88.91(2)  |
| C3    | C4    | 1.380(7)   | Br3   | Sb1   | Br4   | 88.91(2)  |
| C2    | C3    | 1.400(7)   | Br2   | Sb1   | Br1   | 175.45(2) |
| C1    | C2    | 1.365(7)   | Br2   | Sb1   | Br2   | 88.69(1)  |
| C1    | N1    | 1.339(6)   | Br2   | Sb1   | Br2   | 88.69(1)  |
| Br2   | Sb1   | 3.1036(8)  | Br2   | Sb1   | Br3   | 86.59(2)  |
|       |       |            | Br2   | Sb1   | Br3   | 86.59(2)  |
|       |       |            | Br2   | Sb1   | Br3   | 86.96(2)  |
|       |       |            | Br2   | Sb1   | Br4   | 175.49(2) |
|       |       |            | Br2   | Sb1   | Br4   | 175.49(2) |
|       |       |            | Br2   | Sb1   | Br4   | 91.20(1)  |
|       |       |            | Br1   | Sb1   | Br2   | 175.45(2) |
|       |       |            | Br1   | Sb1   | Br2   | 87.16(2)  |
|       |       |            | Br1   | Sb1   | Br2   | 87.16(2)  |
|       |       |            | Br1   | Sb1   | Br3   | 94.66(2)  |
|       |       |            | Br1   | Sb1   | Br3   | 94.66(2)  |
|       |       |            | Br1   | Sb1   | Br4   | 93.08(2)  |
|       |       |            | Br1   | Sb1   | Br4   | 93.08(2)  |

**Figure S5.** ORTEP drawing of compound **5**, (C<sub>5</sub>H<sub>5</sub>NCI)[SbBr<sub>4</sub>].

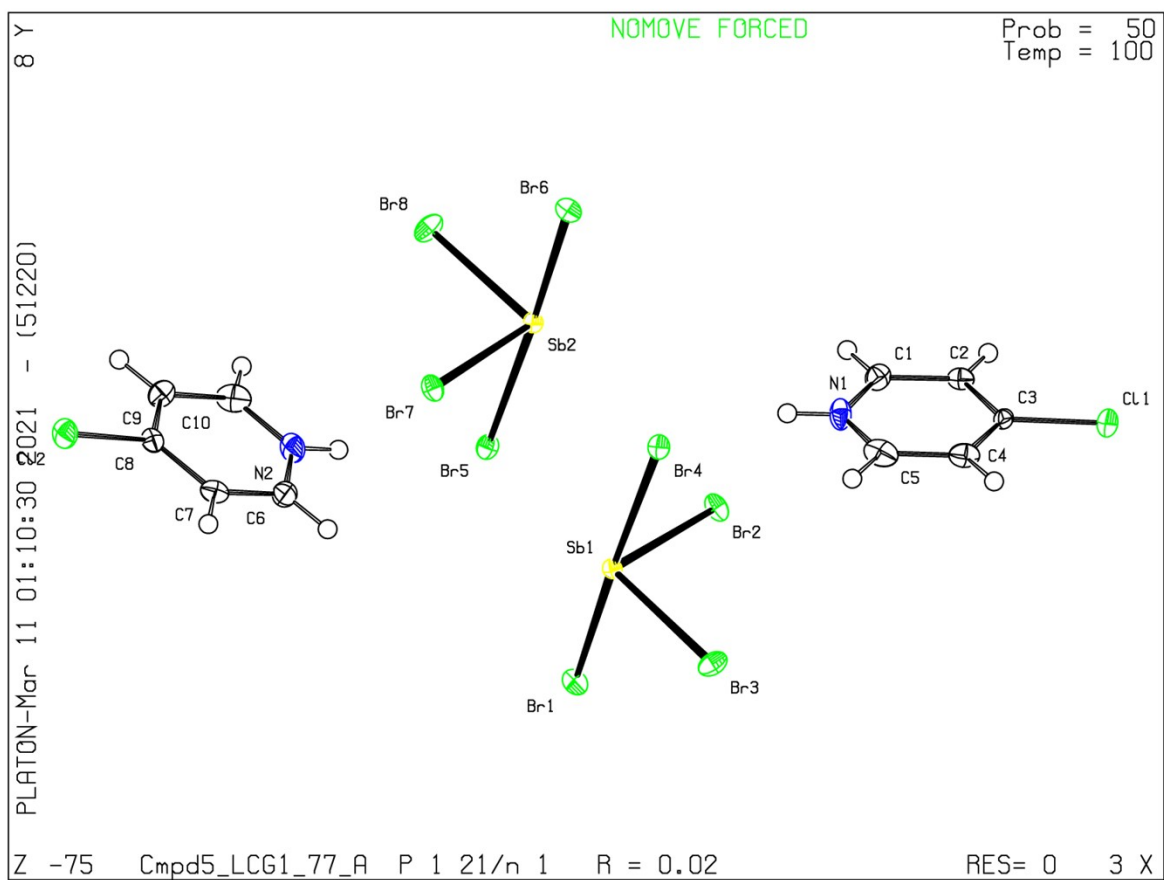

**Table S5.** Bond distances and angles for compound **5**, (C<sub>5</sub>H<sub>5</sub>NCI)[SbBr<sub>4</sub>].

| Atom1 | Atom2 | Length (Å) | Atom1 | Atom2 | Atom3 | Angle (°) |
|-------|-------|------------|-------|-------|-------|-----------|
| N2    | C6    | 1.328(5)   | C1    | C2    | C3    | 118.2(3)  |
| C1    | N1    | 1.344(5)   | C3    | C4    | C5    | 118.2(3)  |
| N1    | C5    | 1.344(5)   | C8    | C7    | C6    | 118.3(3)  |
| N2    | C10   | 1.345(5)   | C8    | C9    | C10   | 118.4(3)  |
| C1    | C2    | 1.369(5)   | Cl1   | C3    | C2    | 118.9(3)  |
| C7    | C6    | 1.371(5)   | Cl2   | C8    | C7    | 119.5(3)  |
| C9    | C10   | 1.374(6)   | N1    | C5    | C4    | 119.6(3)  |
| C4    | C5    | 1.376(6)   | N2    | C10   | C9    | 119.7(3)  |
| C8    | C9    | 1.378(5)   | Cl1   | C3    | C4    | 119.8(3)  |
| C3    | C4    | 1.383(5)   | Cl2   | C8    | C9    | 119.8(3)  |
| C2    | C3    | 1.385(5)   | N1    | C1    | C2    | 119.9(3)  |
| C7    | C8    | 1.396(5)   | N2    | C6    | C7    | 119.9(3)  |
| Cl2   | C8    | 1.717(4)   | C7    | C8    | C9    | 120.7(3)  |
| Cl1   | C3    | 1.720(3)   | C2    | C3    | C4    | 121.3(3)  |
| Sb1   | Br2   | 2.5475(6)  | C1    | N1    | C5    | 122.8(3)  |
| Sb2   | Br7   | 2.5580(6)  | C10   | N2    | C6    | 122.9(3)  |
| Sb1   | Br3   | 2.5841(7)  | Br4   | Sb2   | Br8   | 173.89(2) |
| Sb2   | Br8   | 2.5941(7)  | Br3   | Sb1   | Br5   | 174.39(2) |
| Sb2   | Br6   | 2.6758(4)  | Br1   | Sb1   | Br4   | 177.50(2) |
| Sb1   | Br1   | 2.7282(5)  | Br5   | Sb2   | Br6   | 177.99(2) |
| Sb1   | Br4   | 2.9045(4)  | Br4   | Sb2   | Br7   | 85.89(2)  |
| Sb2   | Br5   | 2.9884(5)  | Br3   | Sb1   | Br4   | 86.23(2)  |
| Sb1   | Br5   | 3.1170(7)  | Br5   | Sb2   | Br8   | 86.65(2)  |
| Sb2   | Br4   | 3.1229(7)  | Br5   | Sb1   | Br2   | 87.30(2)  |
|       |       |            | Br4   | Sb2   | Br5   | 87.57(1)  |
|       |       |            | Br4   | Sb1   | Br2   | 88.00(2)  |
|       |       |            | Br5   | Sb2   | Br7   | 88.72(2)  |
|       |       |            | Br4   | Sb1   | Br5   | 89.18(1)  |
|       |       |            | Br1   | Sb1   | Br2   | 89.65(2)  |
|       |       |            | Br6   | Sb2   | Br7   | 89.92(2)  |
|       |       |            | Sb1   | Br5   | Sb2   | 90.88(1)  |
|       |       |            | Br1   | Sb1   | Br5   | 91.57(2)  |
|       |       |            | Br6   | Sb2   | Br8   | 92.01(2)  |
|       |       |            | Sb1   | Br4   | Sb2   | 92.35(1)  |
|       |       |            | Br1   | Sb1   | Br3   | 93.15(2)  |
|       |       |            | Br4   | Sb2   | Br6   | 93.81(2)  |
|       |       |            | Br3   | Sb1   | Br2   | 95.74(2)  |
|       |       |            | Br7   | Sb2   | Br8   | 95.97(2)  |

**Figure S6.** ORTEP drawing of compound **6**,  $(C_5H_6N)[SbI_4]$ .

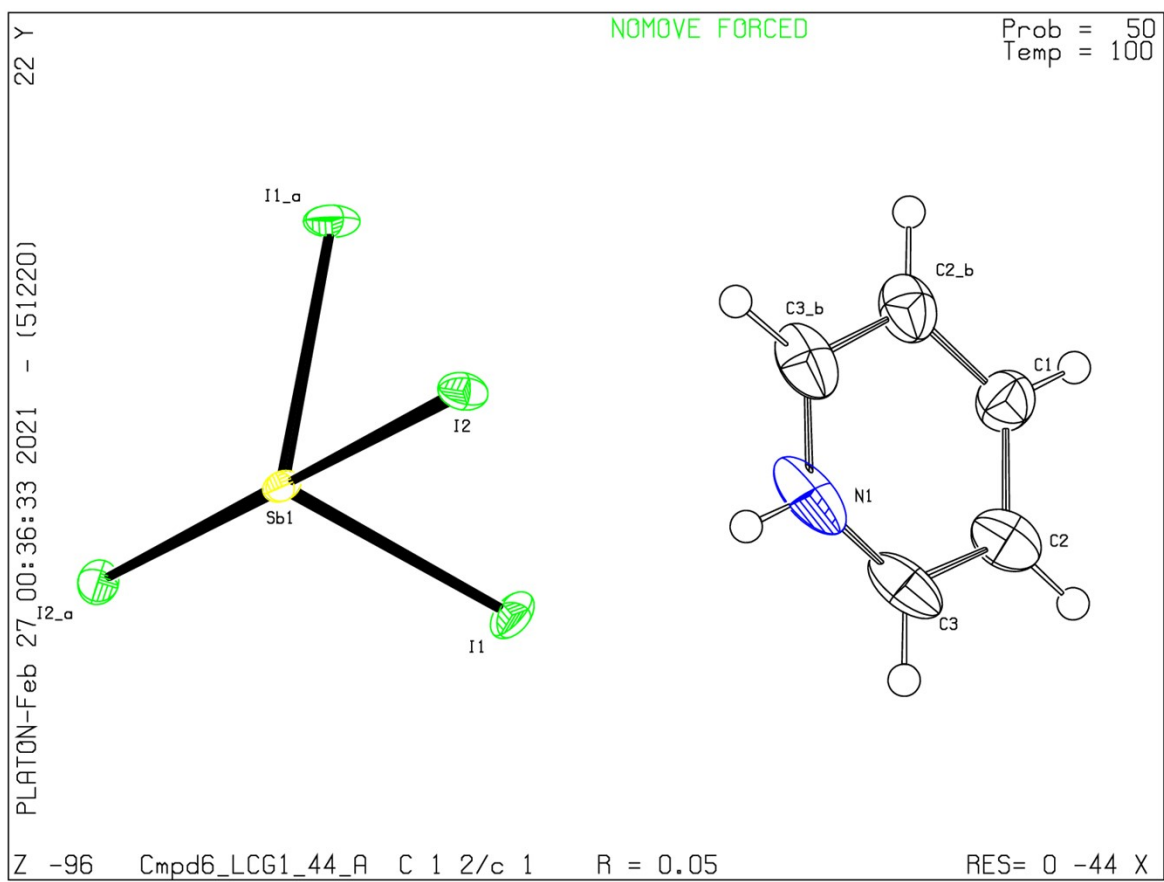

**Table S6.** Bond distances and angles for compound **6**, (C<sub>5</sub>H<sub>6</sub>N)[SbI<sub>4</sub>].

| Atom1 | Atom2 | Length (Å) | Atom1 | Atom2 | Atom3 | Angle (°) |
|-------|-------|------------|-------|-------|-------|-----------|
| I1    | Sb1   | 2.8313(15) | I1    | Sb1   | I1    | 93.76(6)  |
| I2    | Sb1   | 3.0630(13) | I1    | Sb1   | I2    | 92.42(4)  |
| N1    | C3    | 1.33(2)    | I1    | Sb1   | I2    | 88.02(3)  |
| C1    | C2    | 1.38(2)    | I1    | Sb1   | I2    | 88.02(3)  |
| C2    | C3    | 1.40(3)    | I1    | Sb1   | I2    | 92.42(4)  |
|       |       |            | I2    | Sb1   | I2    | 179.36(6) |
|       |       |            | C3    | N1    | C3    | 123.(2)   |
|       |       |            | C2    | C1    | C2    | 122.(2)   |
|       |       |            | C1    | C2    | C3    | 117.6(18) |
|       |       |            | N1    | C3    | C2    | 120.0(18) |

**Figure S7.** ORTEP drawing of compound **7**,  $(C_5H_5NCl)[SbI_4]$ .

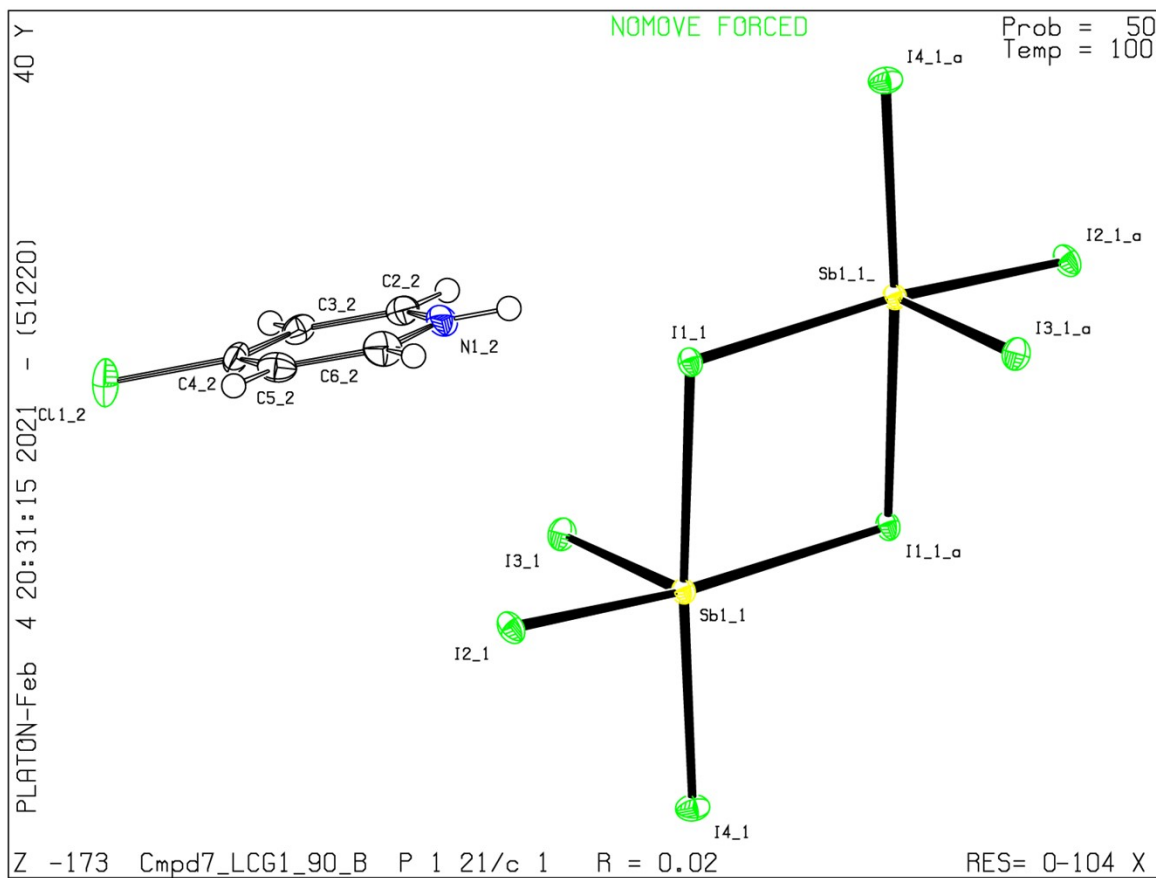

**Table S7.** Bond distances and angles for compound **7**, (C<sub>5</sub>H<sub>5</sub>NCI)[SbI<sub>4</sub>].

| Atom1 | Atom2 | Length (Å) | Atom1 | Atom2 | Atom3 | Angle (°) |
|-------|-------|------------|-------|-------|-------|-----------|
| Sb1   | I1    | 3.1835(4)  | Sb1   | I14   | Sb1   | 92.24(1)  |
| Sb1   | I1    | 3.1835(4)  | Sb1   | I14   | Sb1   | 92.24(1)  |
| Sb1   | I1    | 3.1955(4)  | Sb1   | I1    | Sb1   | 93.30(1)  |
| Sb1   | I2    | 2.8540(4)  | Sb1   | I1    | Sb1   | 93.30(1)  |
| Sb1   | I3    | 2.8205(6)  | N1    | C6    | C5    | 119.7(3)  |
| Sb1   | I4    | 2.9080(4)  | N1    | C2    | C3    | 120.2(3)  |
| Sb1   | I4    | 2.9080(4)  | I3    | Sb1   | I1    | 88.45(1)  |
| Sb1   | I4    | 3.3775(6)  | I3    | Sb1   | I14   | 169.86(1) |
| N1    | C2    | 1.346(5)   | I3    | Sb1   | I14   | 91.23(1)  |
| N1    | C6    | 1.343(5)   | I2    | Sb1   | I1    | 171.59(1) |
| I4    | Sb1   | 3.3775(6)  | I2    | Sb1   | I14   | 93.82(1)  |
| I1    | Sb1   | 3.1955(4)  | I2    | Sb1   | I14   | 94.05(1)  |
| Cl1   | C4    | 1.716(4)   | I2    | Sb1   | I3    | 96.08(1)  |
| C5    | C6    | 1.381(5)   | I14   | Sb1   | I1    | 93.15(1)  |
| C4    | C5    | 1.388(5)   | I14   | Sb1   | I14   | 87.76(1)  |
| C3    | C4    | 1.390(5)   | I14   | Sb1   | I14   | 87.76(1)  |
| C2    | C3    | 1.370(5)   | I1    | Sb1   | I1    | 86.70(1)  |
|       |       |            | I1    | Sb1   | I1    | 86.70(1)  |
|       |       |            | I1    | Sb1   | I14   | 173.51(1) |
|       |       |            | I1    | Sb1   | I14   | 81.54(1)  |
|       |       |            | I1    | Sb1   | I14   | 85.79(1)  |
|       |       |            | I1    | Sb1   | I2    | 85.84(1)  |
|       |       |            | I1    | Sb1   | I3    | 95.25(1)  |
|       |       |            | Cl1   | C4    | C3    | 119.7(3)  |
|       |       |            | Cl1   | C4    | C5    | 119.0(3)  |
|       |       |            | C4    | C5    | C6    | 118.1(3)  |
|       |       |            | C3    | C4    | C5    | 121.3(3)  |
|       |       |            | C2    | N1    | C6    | 122.6(3)  |
|       |       |            | C2    | C3    | C4    | 118.0(3)  |

**Figure S8.** ORTEP drawing of compound **8**,  $(C_5H_5NBr)[SbI_4]$ .

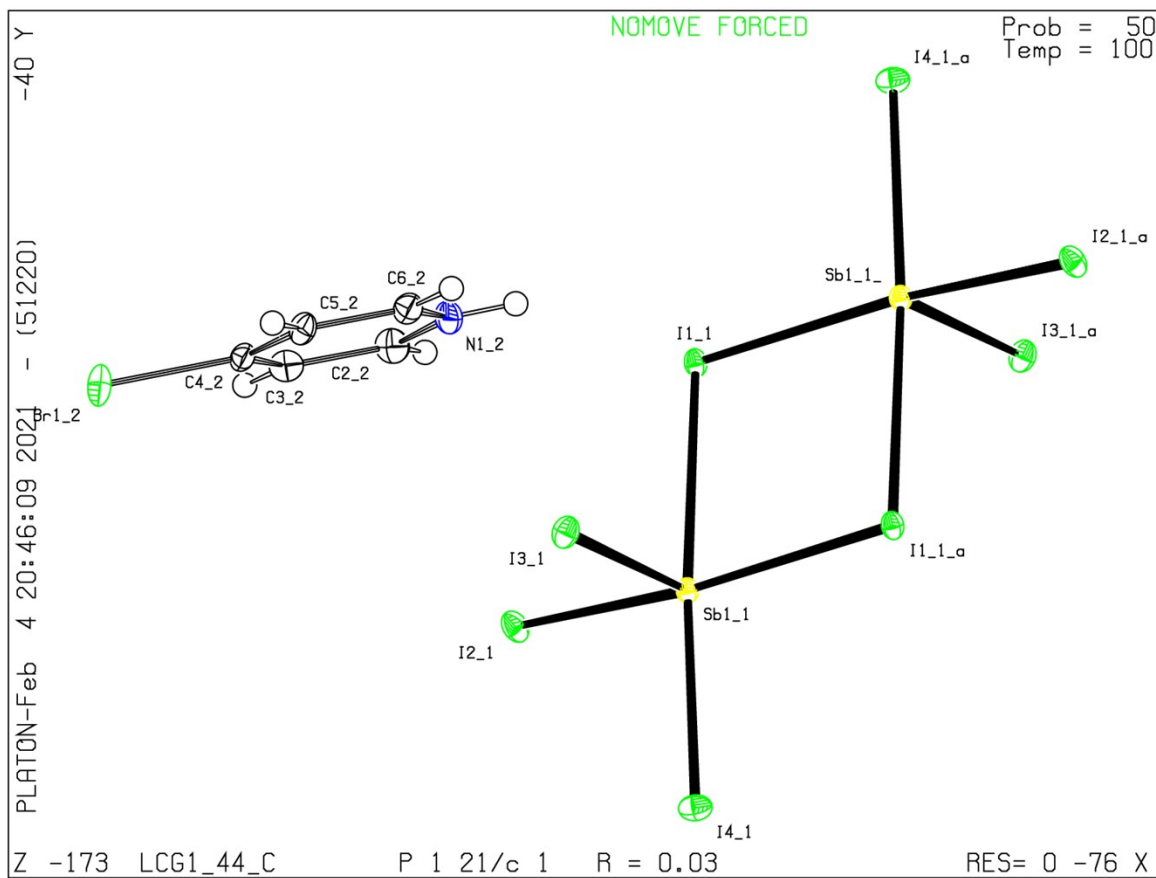



**Table S8.** Bond distances and angles for compound **8**, (C<sub>5</sub>H<sub>5</sub>NBr)[SbI<sub>4</sub>].

| Atom1 | Atom2 | Length (Å) | Atom1 | Atom2 | Atom3 | Angle (°) |
|-------|-------|------------|-------|-------|-------|-----------|
| Sb1   | I1    | 3.1660(4)  | Sb1   | I4    | Sb1   | 92.78(1)  |
| Sb1   | I2    | 2.8487(4)  | Sb1   | I4    | Sb1   | 92.78(1)  |
| Sb1   | I3    | 2.8183(6)  | Sb1   | I1    | Sb1   | 93.19(1)  |
| Sb1   | I4    | 2.9232(3)  | Sb1   | I1    | Sb1   | 93.19(1)  |
| N1    | C2    | 1.340(5)   | N1    | C6    | C5    | 119.5(3)  |
| N1    | C6    | 1.346(4)   | N1    | C2    | C3    | 119.7(3)  |
| C5    | C6    | 1.381(4)   | I4    | Sb1   | I1    | 93.03(1)  |
| C4    | C5    | 1.393(4)   | I4    | Sb1   | I4    | 87.22(1)  |
| C3    | C4    | 1.387(4)   | I4    | Sb1   | I4    | 87.22(1)  |
| C2    | C3    | 1.383(4)   | I3    | Sb1   | I1    | 88.30(1)  |
| Br1   | C4    | 1.873(3)   | I3    | Sb1   | I4    | 168.93(1) |
|       |       |            | I3    | Sb1   | I4    | 91.10(1)  |
|       |       |            | I2    | Sb1   | I1    | 171.91(1) |
|       |       |            | I2    | Sb1   | I3    | 95.95(1)  |
|       |       |            | I2    | Sb1   | I4    | 93.76(1)  |
|       |       |            | I2    | Sb1   | I4    | 95.08(1)  |
|       |       |            | I1    | Sb1   | I1    | 86.81(1)  |
|       |       |            | I1    | Sb1   | I1    | 86.81(1)  |
|       |       |            | I1    | Sb1   | I2    | 85.94(1)  |
|       |       |            | I1    | Sb1   | I3    | 95.37(1)  |
|       |       |            | I1    | Sb1   | I4    | 173.52(1) |
|       |       |            | I1    | Sb1   | I4    | 80.87(1)  |
|       |       |            | I1    | Sb1   | I4    | 86.36(1)  |
|       |       |            | C4    | C5    | C6    | 118.1(3)  |
|       |       |            | C3    | C4    | C5    | 121.4(3)  |
|       |       |            | C2    | N1    | C6    | 123.4(3)  |
|       |       |            | C2    | C3    | C4    | 118.1(3)  |
|       |       |            | Br1   | C4    | C3    | 118.6(2)  |
|       |       |            | Br1   | C4    | C5    | 120.0(2)  |

**Figure S9.** ESP surfaces of *para*-halopyridinium cations used in the synthesis of **1-8**.

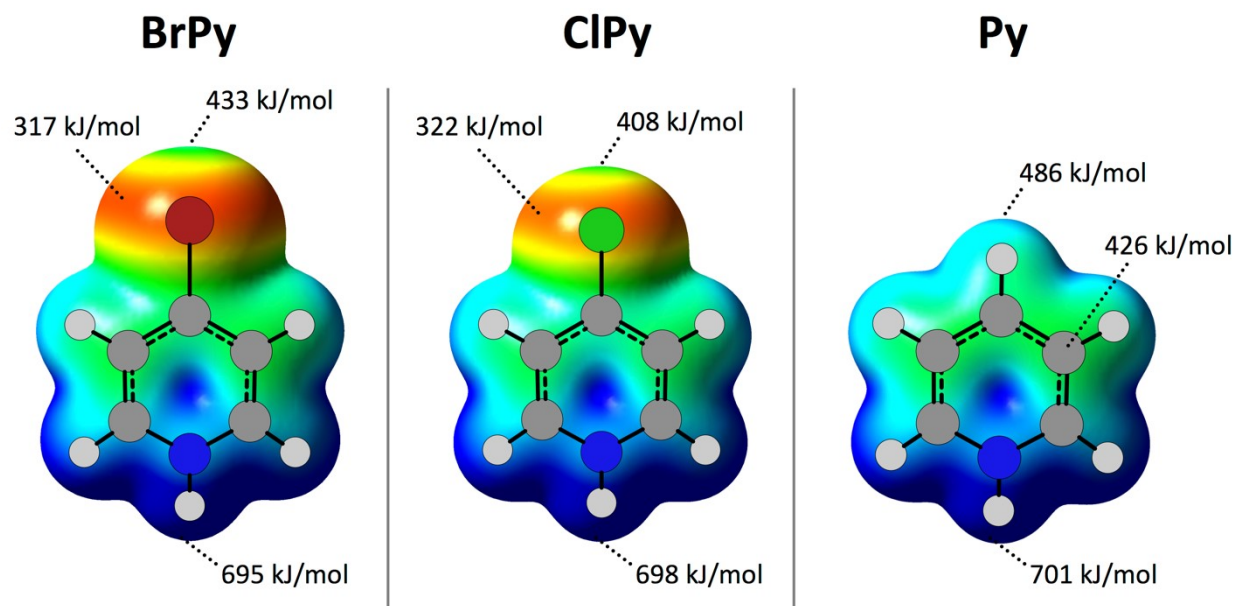

**Figure S10.** Tauc plot of compounds 1-8.

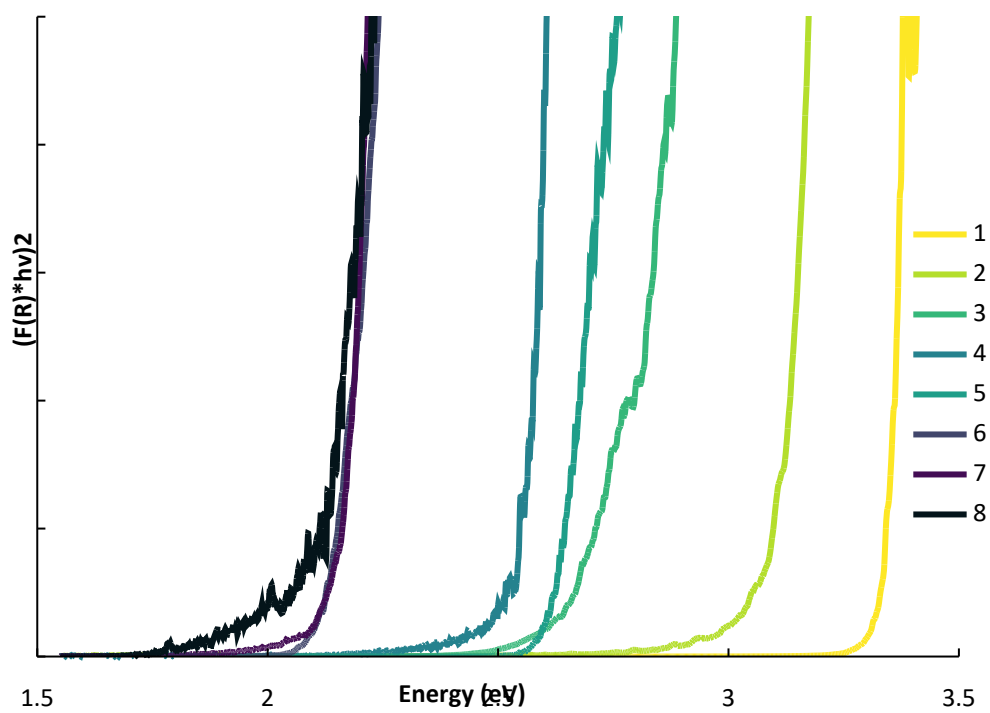

Figure S11. NBO calculation models of 1-8.

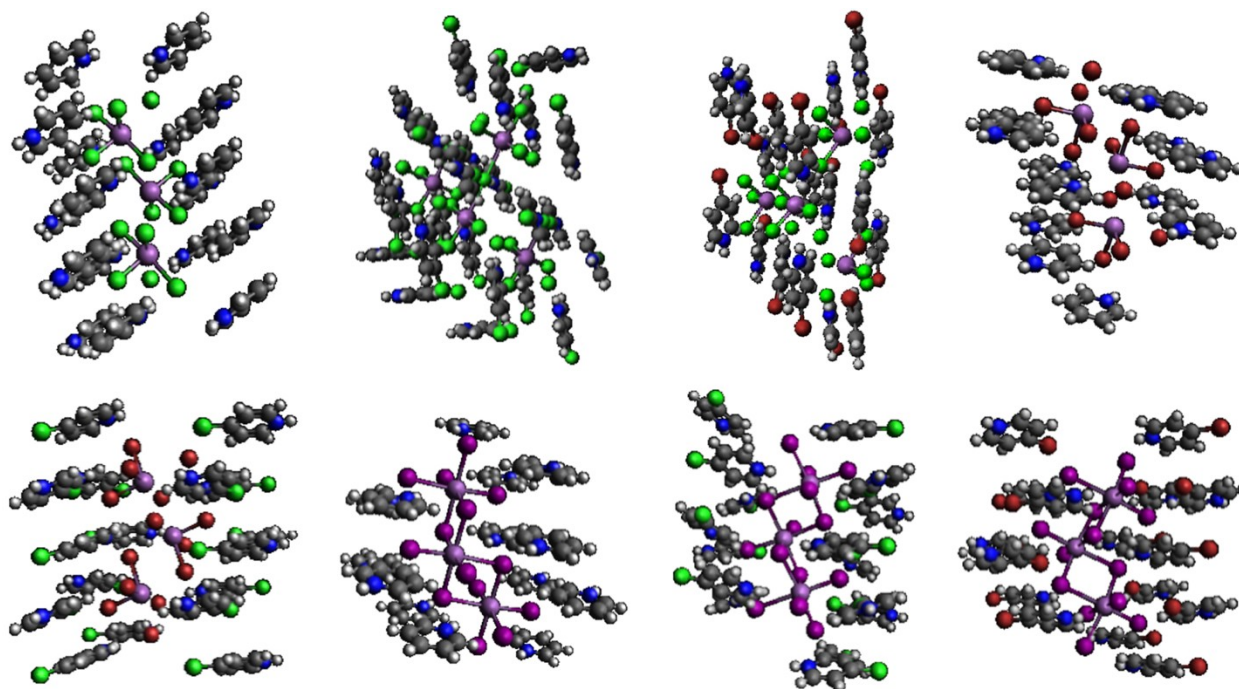

**Table S9.** NLMO metrics for specific atoms in SbX bond

| Sb-X | Cation   | Halide       |            |            | Metal       |            |       |
|------|----------|--------------|------------|------------|-------------|------------|-------|
|      |          | Halide Cont. | %s-Orbital | %p-Orbital | Metal Cont. | %p-Orbital |       |
| 1    | Sb1-Cl3  | HPy          | 78.163     | 19.35      | 80.17       | 20.491     | 94.1  |
| 1    | Sb1-Cl4  | HPy          | 80.137     | 20.55      | 79.02       | 18.247     | 96.42 |
| 1    | Sb1-Cl5  | HPy          | 83.933     | 19.48      | 80.26       | 15.087     | 97.75 |
| 1    | Sb1-Cl2  | HPy          | 89.764     | 17.48      | 82.46       | 8.366      | 98.11 |
| 1    | Sb1-Cl16 | HPy          | 94.984     | 4.87       | 95.1        | 3.329      | 97.11 |
| 1    | Sb1-Cl7  | HPy          | 95.625     | 16.36      | 83.59       | 2.705      | 96.37 |
| 2    | Sb1-Cl4  | ClPy         | 79.397     | 20.5       | 79.09       | 19.192     | 94.67 |
| 2    | Sb1-Cl2  | ClPy         | 81.606     | 20.27      | 79.35       | 17.173     | 96.9  |
| 2    | Sb1-Cl5  | ClPy         | 81.982     | 20.55      | 79.12       | 16.578     | 97.06 |
| 2    | Sb1-Cl7  | ClPy         | 91.543     | 1.38       | 98.62       | 4.612      | 97.87 |
| 2    | Sb1-Cl6  | ClPy         | 91.409     | 0.67       | 99.33       | 4.597      | 97.74 |
| 2    | Sb1-Cl15 | ClPy         | 91.811     | 1.27       | 97.09       | 3.122      | 97.11 |
| 3    | Sb1-Cl2  | BrPy         | 79.038     | 19.09      | 80.41       | 19.636     | 94.91 |
| 3    | Sb1-Cl4  | BrPy         | 80.39      | 19.8       | 79.87       | 18.189     | 95.7  |
| 3    | Sb1-Cl5  | BrPy         | 84.372     | 21.21      | 78.55       | 14.734     | 97.93 |
| 3    | Sb1-Cl3  | BrPy         | 88.647     | 5.74       | 94.23       | 7.811      | 97.94 |
| 3    | Sb1-Cl11 | BrPy         | 91.25      | 3.49       | 96.5        | 5.605      | 97.76 |
| 3    | Sb1-Cl16 | BrPy         | 97.667     | 66.6       | 33.4        | 1.291      | 96.66 |
| 4    | Sb7-Br8  | HPy          | 74.623     | 16.31      | 83.27       | 22.866     | 96.32 |
| 4    | Sb7-Br10 | HPy          | 77.034     | 18.2       | 81.44       | 20.509     | 97.96 |
| 4    | Sb7-Br9  | HPy          | 81.45      | 16.07      | 83.73       | 17.246     | 97.96 |
| 4    | Sb7-Br11 | HPy          | 86.459     | 16.39      | 83.48       | 11.054     | 98.06 |
| 4    | Sb7-Br6  | HPy          | 92.583     | 1.19       | 98.75       | 3.981      | 96.97 |
| 4    | Sb7-Br14 | HPy          | 94.289     | 14.73      | 85.22       | 3.669      | 96.33 |
| 5    | Sb3-Br8  | ClPy         | 74.784     | 16.58      | 82.99       | 23.157     | 95.9  |
| 5    | Sb3-Br9  | ClPy         | 78.32      | 18.67      | 81          | 19.832     | 97.84 |
| 5    | Sb3-Br7  | ClPy         | 81.058     | 18.05      | 81.73       | 17.772     | 98.37 |
| 5    | Sb3-Br6  | ClPy         | 86.776     | 16.46      | 83.42       | 10.062     | 98.16 |
| 5    | Sb3-Br5  | ClPy         | 92.231     | 2.89       | 97.03       | 4.766      | 97.26 |
| 5    | Sb3-Br12 | ClPy         | 94.096     | 13.24      | 86.7        | 3.62       | 96.09 |
| 6    | Sb1-I5   | HPy          | 72.83      | 14.47      | 85.23       | 26.875     | 97.94 |
| 6    | Sb1-I7   | HPy          | 72.832     | 14.47      | 85.23       | 26.873     | 97.97 |
| 6    | Sb1-I6   | HPy          | 80.768     | 13.2       | 86.64       | 17.839     | 98.63 |
| 6    | Sb1-I4   | HPy          | 80.749     | 13.21      | 86.64       | 17.859     | 98.63 |
| 6    | Sb1-I9   | HPy          | 89.519     | 10.58      | 89.36       | 7.195      | 96.87 |
| 6    | Sb1-I8   | HPy          | 89.524     | 10.55      | 89.39       | 7.19       | 96.87 |
| 7    | Sb3-I5   | ClPy         | 70.612     | 13.13      | 86.49       | 29.027     | 97.72 |
| 7    | Sb3-I6   | ClPy         | 75.608     | 15.76      | 84.05       | 24.041     | 98.59 |
| 7    | Sb3-I4   | ClPy         | 76.506     | 13.6       | 86.19       | 22.998     | 98.86 |
| 7    | Sb3-I7   | ClPy         | 84.098     | 15.03      | 84.87       | 11.815     | 97.78 |
| 7    | Sb3-I8   | ClPy         | 86.162     | 11.23      | 88.64       | 9.871      | 97.8  |
| 7    | Sb3-I9   | ClPy         | 91.479     | 7.33       | 92.63       | 5.312      | 96.23 |
| 8    | Sb1-I4   | BrPy         | 71.697     | 13.65      | 86.03       | 27.946     | 97.96 |
| 8    | Sb1-I5   | BrPy         | 74.294     | 14.88      | 84.87       | 25.398     | 98.45 |
| 8    | Sb1-I6   | BrPy         | 74.772     | 13.33      | 86.42       | 24.822     | 98.83 |
| 8    | Sb1-I7   | BrPy         | 85.095     | 14.99      | 84.9        | 10.635     | 97.63 |
| 8    | Sb1-I9   | BrPy         | 87.857     | 23.42      | 76.54       | 7.668      | 97.28 |
| 8    | Sb1-I8   | BrPy         | 90.188     | 9.88       | 90.02       | 6.215      | 96.78 |

**Table S10.** Specific SOPT values for NCI stabilization energy (kcal/mol).

| # | Metal-Halide | Cation | Atom     | Stabilization Energy (kCal/mol) |      |      |          | Total |
|---|--------------|--------|----------|---------------------------------|------|------|----------|-------|
|   |              |        |          | X-X                             | X-H  | X-C  | X- $\pi$ |       |
| 1 | SbCl         | HPy    | Sb1-Cl2  | 0.00                            | 6.04 | 0.45 | 1.03     | 7.52  |
| 1 | SbCl         | HPy    | Sb1-Cl3  | 0.00                            | 1.09 | 0.17 | 0.83     | 2.09  |
| 1 | SbCl         | HPy    | Sb1-Cl4  | 0.00                            | 1.53 | 0.19 | 0.49     | 2.21  |
| 1 | SbCl         | HPy    | Sb1-Cl5  | 0.00                            | 1.55 | 0.52 | 0.13     | 2.20  |
| 1 | SbCl         | HPy    | Sb1-Cl16 | 0.00                            | 1.52 | 0.53 | 0.07     | 2.12  |
| 1 | SbCl         | HPy    | Sb1-Cl7  | 0.00                            | 6.86 | 0.39 | 1.26     | 8.51  |
| 2 | SbCl         | CIPy   | Sb1-Cl2  | 0.00                            | 1.13 | 0.23 | 0.51     | 1.87  |
| 2 | SbCl         | CIPy   | Sb1-Cl4  | 0.00                            | 1.39 | 0.18 | 0.24     | 1.81  |
| 2 | SbCl         | CIPy   | Sb1-Cl5  | 0.07                            | 1.17 | 0.00 | 0.81     | 2.05  |
| 2 | SbCl         | CIPy   | Sb1-Cl6  | 1.57                            | 9.29 | 0.27 | 0.38     | 11.51 |
| 2 | SbCl         | CIPy   | Sb1-Cl7  | 0.00                            | 5.00 | 0.28 | 0.23     | 5.51  |
| 2 | SbCl         | CIPy   | Sb1-Cl15 | 0.00                            | 4.52 | 0.29 | 0.20     | 5.01  |
| 3 | SbCl         | BrPy   | Sb1-Cl4  | 2.59                            | 0.59 | 0.42 | 0.13     | 3.73  |
| 3 | SbCl         | BrPy   | Sb1-Cl5  | 0.00                            | 3.89 | 0.61 | 0.34     | 4.84  |
| 3 | SbCl         | BrPy   | Sb1-Cl2  | 0.00                            | 1.01 | 0.31 | 0.83     | 2.15  |
| 3 | SbCl         | BrPy   | Sb1-Cl3  | 0.00                            | 3.51 | 0.21 | 0.64     | 4.36  |
| 3 | SbCl         | BrPy   | Sb1-Cl11 | 0.00                            | 6.61 | 0.28 | 1.16     | 8.05  |
| 3 | SbCl         | BrPy   | Sb1-Cl16 | 0.00                            | 2.40 | 0.27 | 0.20     | 2.87  |
| 4 | SbBr         | HPy    | Sb7-Br6  | 0.00                            | 2.80 | 0.77 | 0.10     | 3.67  |
| 4 | SbBr         | HPy    | Sb7-Br8  | 0.00                            | 0.85 | 0.23 | 0.66     | 1.74  |
| 4 | SbBr         | HPy    | Sb7-Br9  | 0.00                            | 0.85 | 0.19 | 0.12     | 1.16  |
| 4 | SbBr         | HPy    | Sb7-Br10 | 0.00                            | 0.50 | 0.24 | 1.20     | 1.94  |
| 4 | SbBr         | HPy    | Sb7-Br11 | 0.00                            | 2.74 | 0.74 | 0.18     | 3.66  |
| 4 | SbBr         | HPy    | Sb7-Br14 | 0.00                            | 0.94 | 0.21 | 0.20     | 1.35  |
| 5 | SbBr         | CIPy   | Sb3-Br5  | 0.29                            | 5.42 | 0.44 | 0.00     | 6.15  |
| 5 | SbBr         | CIPy   | Sb3-Br6  | 0.00                            | 7.31 | 0.20 | 0.00     | 7.51  |
| 5 | SbBr         | CIPy   | Sb3-Br7  | 0.00                            | 2.54 | 0.00 | 0.60     | 3.14  |
| 5 | SbBr         | CIPy   | Sb3-Br8  | 1.67                            | 0.15 | 0.00 | 1.60     | 3.42  |
| 5 | SbBr         | CIPy   | Sb3-Br9  | 0.05                            | 0.33 | 0.18 | 1.18     | 1.74  |
| 5 | SbBr         | CIPy   | Sb3-Br12 | 0.00                            | 1.25 | 0.21 | 0.08     | 1.54  |
| 6 | SbI          | HPy    | Sb1-I4   | 0.00                            | 1.62 | 0.27 | 0.26     | 2.15  |
| 6 | SbI          | HPy    | Sb1-I5   | 0.00                            | 0.72 | 0.22 | 1.07     | 2.01  |
| 6 | SbI          | HPy    | Sb1-I6   | 0.00                            | 1.62 | 0.27 | 0.26     | 2.15  |
| 6 | SbI          | HPy    | Sb1-I7   | 0.00                            | 0.72 | 0.22 | 1.07     | 2.01  |
| 6 | SbI          | HPy    | Sb1-I8   | 0.00                            | 1.84 | 0.31 | 0.16     | 2.31  |
| 6 | SbI          | HPy    | Sb1-I9   | 0.00                            | 1.85 | 0.31 | 0.16     | 2.32  |
| 7 | SbI          | CIPy   | Sb3-I4   | 0.32                            | 1.00 | 0.06 | 0.05     | 1.43  |
| 7 | SbI          | CIPy   | Sb3-I5   | 0.66                            | 1.41 | 0.05 | 0.80     | 2.92  |
| 7 | SbI          | CIPy   | Sb3-I6   | 0.00                            | 2.25 | 0.51 | 0.96     | 3.72  |
| 7 | SbI          | CIPy   | Sb3-I7   | 0.00                            | 3.42 | 0.76 | 0.46     | 4.64  |
| 7 | SbI          | CIPy   | Sb3-I8   | 0.31                            | 0.93 | 0.10 | 0.00     | 1.34  |
| 7 | SbI          | CIPy   | Sb3-I9   | 0.00                            | 3.76 | 0.83 | 0.50     | 5.09  |
| 8 | SbI          | BrPy   | Sb1-I4   | 0.14                            | 1.03 | 0.34 | 1.30     | 2.81  |
| 8 | SbI          | BrPy   | Sb1-I5   | 0.00                            | 1.98 | 0.11 | 1.99     | 4.08  |
| 8 | SbI          | BrPy   | Sb1-I6   | 2.01                            | 0.54 | 0.05 | 0.31     | 2.91  |
| 8 | SbI          | BrPy   | Sb1-I7   | 0.18                            | 4.95 | 0.89 | 0.00     | 6.02  |
| 8 | SbI          | BrPy   | Sb1-I8   | 2.05                            | 0.52 | 0.07 | 0.40     | 3.04  |
| 8 | SbI          | BrPy   | Sb1-I9   | 0.27                            | 5.65 | 0.91 | 0.00     | 6.83  |

**Table S11.** QTAIM metrics for the three crystallographically unique Sb-X bonds in **1-8**.

| Compound | Metal-Halide | Cation | WBI    | e <sup>-</sup> Density | Laplacian  |
|----------|--------------|--------|--------|------------------------|------------|
| 1        | SbCl         | HPy    | 0.3141 | 0.03831923             | 0.0581074  |
| 1        | SbCl         | HPy    | 0.6765 | 0.08620254             | 0.1196433  |
| 1        | SbCl         | HPy    | 0.6409 | 0.08318599             | 0.11902492 |
| 1        | SbCl         | HPy    | 0.4904 | 0.06641973             | 0.09215661 |
| 1        | SbCl         | HPy    | 0.1105 | 0.02326767             | 0.04621105 |
| 1        | SbCl         | HPy    | 0.1509 | 0.0204002              | 0.04424879 |
| 2        | SbCl         | CIPy   | 0.5874 | 0.07764108             | 0.10890344 |
| 2        | SbCl         | CIPy   | 0.6156 | 0.08345464             | 0.11907223 |
| 2        | SbCl         | CIPy   | 0.5683 | 0.07632051             | 0.10793928 |
| 2        | SbCl         | CIPy   | 0.2031 | 0.02642162             | 0.04778619 |
| 2        | SbCl         | CIPy   | 0.2108 | 0.0288469              | 0.05223379 |
| 2        | SbCl         | CIPy   | 0.1716 | 0.02322426             | 0.0451892  |
| 3        | SbCl         | BrPy   | 0.5818 | 0.08505781             | 0.11473975 |
| 3        | SbCl         | BrPy   | 0.4854 | 0.04152379             | 0.06224566 |
| 3        | SbCl         | BrPy   | 0.6734 | 0.07896259             | 0.11261854 |
| 3        | SbCl         | BrPy   | 0.3201 | 0.06687976             | 0.09507381 |
| 3        | SbCl         | BrPy   | 0.2345 | 0.02882461             | 0.04926791 |
| 3        | SbCl         | BrPy   | 0.0877 | 0.01649106             | 0.03822917 |
| 4        | SbBr         | HPy    | 0.2265 | 0.02605232             | 0.04006254 |
| 4        | SbBr         | HPy    | 0.7133 | 0.07103509             | 0.06056187 |
| 4        | SbBr         | HPy    | 0.5127 | 0.05218683             | 0.05158904 |
| 4        | SbBr         | HPy    | 0.6572 | 0.06856559             | 0.06595465 |
| 4        | SbBr         | HPy    | 0.3717 | 0.03627113             | 0.04309411 |
| 4        | SbBr         | HPy    | 0.1428 | 0.01925834             | 0.03455599 |
| 5        | SbBr         | CIPy   | 0.2292 | 0.02686261             | 0.04061767 |
| 5        | SbBr         | CIPy   | 0.3671 | 0.0349583              | 0.04199982 |
| 5        | SbBr         | CIPy   | 0.5244 | 0.05817985             | 0.05974371 |
| 5        | SbBr         | CIPy   | 0.7123 | 0.07244802             | 0.06268986 |
| 5        | SbBr         | CIPy   | 0.6395 | 0.06706069             | 0.06530618 |
| 5        | SbBr         | CIPy   | 0.1446 | 0.01928907             | 0.03449916 |
| 6        | SbI          | HPy    | 0.4872 | 0.03992645             | 0.03280466 |
| 6        | SbI          | HPy    | 0.7093 | 0.05807797             | 0.0297083  |
| 6        | SbI          | HPy    | 0.4877 | 0.03998232             | 0.03280626 |
| 6        | SbI          | HPy    | 0.7093 | 0.05807809             | 0.02970983 |
| 6        | SbI          | HPy    | 0.2678 | 0.02459406             | 0.03137598 |
| 6        | SbI          | HPy    | 0.2679 | 0.02461612             | 0.03139774 |
| 7        | SbI          | CIPy   | 0.5483 | 0.04750505             | 0.03410942 |
| 7        | SbI          | CIPy   | 0.7811 | 0.05944099             | 0.02608264 |
| 7        | SbI          | CIPy   | 0.6093 | 0.05144898             | 0.03374065 |
| 7        | SbI          | CIPy   | 0.4201 | 0.03453027             | 0.03310136 |
| 7        | SbI          | CIPy   | 0.3433 | 0.02874337             | 0.03090945 |
| 7        | SbI          | CIPy   | 0.216  | 0.02187476             | 0.03067514 |
| 8        | SbI          | BrPy   | 0.7475 | 0.05742676             | 0.02807747 |
| 8        | SbI          | BrPy   | 0.6631 | 0.05407679             | 0.03205011 |
| 8        | SbI          | BrPy   | 0.5944 | 0.04837339             | 0.03178601 |
| 8        | SbI          | BrPy   | 0.3806 | 0.03241009             | 0.03295307 |
| 8        | SbI          | BrPy   | 0.2292 | 0.02229111             | 0.03000896 |
| 8        | SbI          | BrPy   | 0.3091 | 0.02924107             | 0.03408277 |

**Figure S12.** Correlation plots of **1-8** comparing bandgap energy, Wiberg Indexes, electron density ( $\rho$ ), octahedral distortion, stabilization energy, Sb-X bond covalency, and intermediate band hybridization. Note that covalency is calculated by the NLMO determined Sb/X contribution ratio and hybridization is calculated from the DOS determined HOMO Sb s-state / halide p-state ratio. Color scheme: SbCl, teal; SbBr, yellow; Sbl, red.

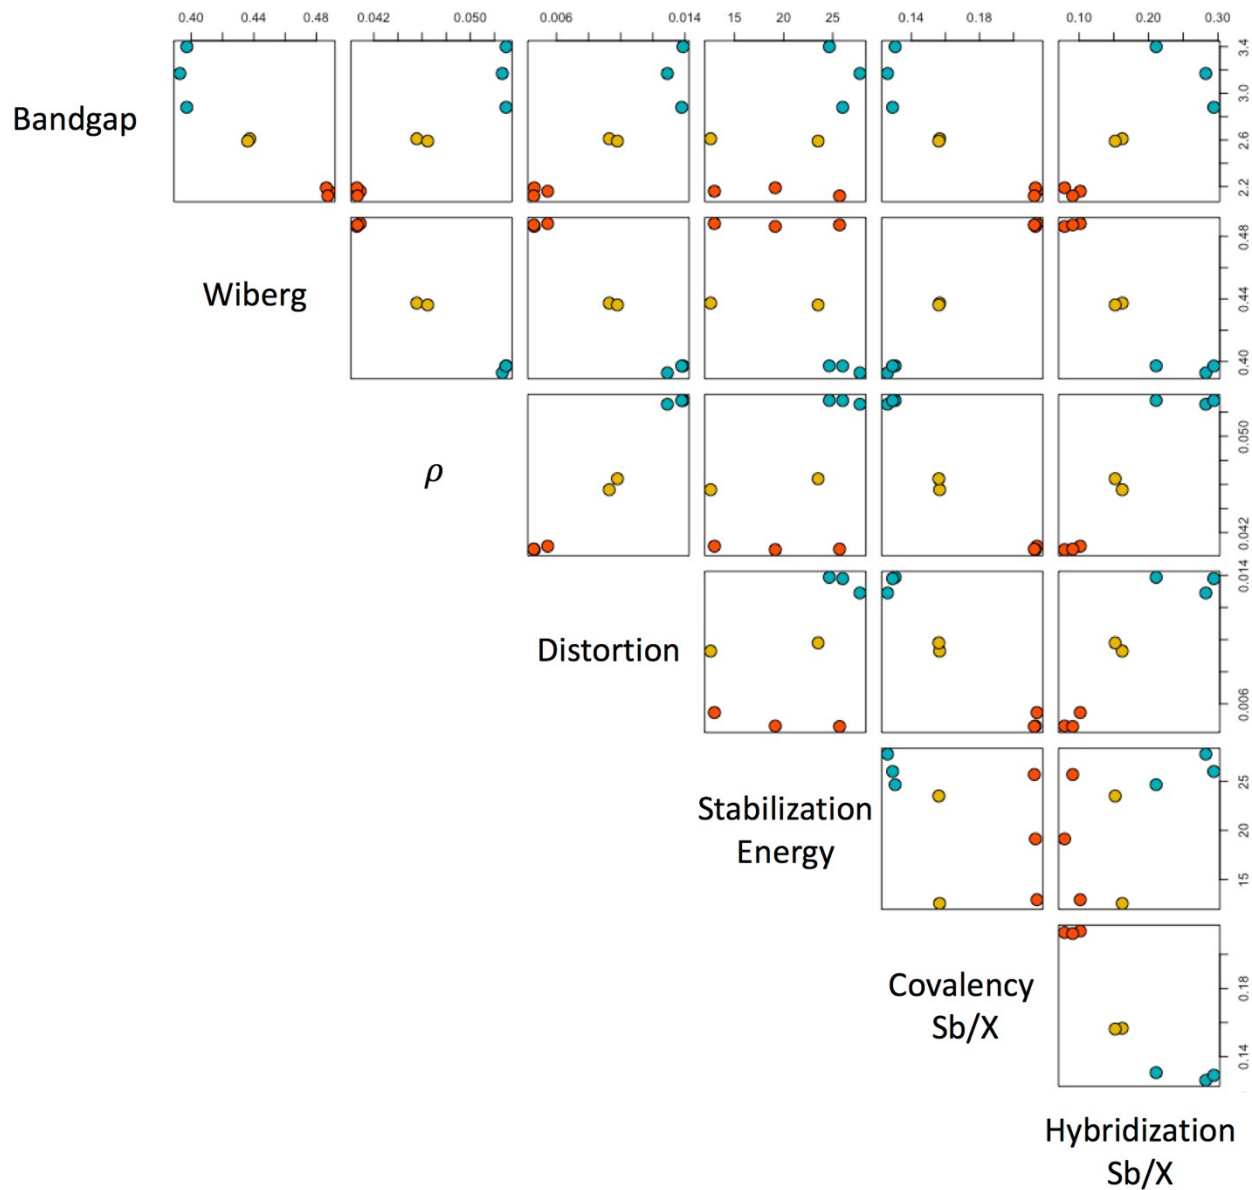

Supplement: d2cp01996e1.pdf [file d2cp01996e1.pdf]
